# Supplementary material for: Framework for Planning and Evaluation of Nature-Based Solutions for Water in Peri-Urban Areas
Source: MDPI journal article supplement (doi:10.3390/su14137952), 2022-06-29
Supplement: s1 [file s1]

## Framework for planning and evaluation of nature-based solutions for water in peri-urban

Ana Paula Morais de Lima<sup>2</sup>, Aline F. Rodrigues<sup>1,2</sup>, Agnieszka E. Latawiec<sup>1,2,3,4</sup>, Viviane Dib<sup>2,5</sup>, Fernanda Gomes<sup>2</sup>, Veronica Maioli<sup>1,2</sup>, Ingrid Pena<sup>1,2</sup>, Fernanda Tubenchlak<sup>2</sup>, Alanna J. Rebelo<sup>6</sup>, Karen J. Esler<sup>6</sup>, Amy M.P. Oen, Nancy Andrea Ramírez-Agudelo<sup>8</sup>, Elisabeth Roca Bosch<sup>8</sup>, Nandita Singh<sup>9</sup>, Lina Suleiman<sup>10</sup>, Sarah E. Hale<sup>7</sup>

- 1- Pontifical Catholic University of Rio de Janeiro, Department of Geography and Environment / Rio Conservation and Sustainability Science Centre, R. Marquês de São Vicente, 225 - Gávea, Rio de Janeiro - RJ, 22451-000, Brazil,
- 2- International Institute for Sustainability, R. Dona Castorina 124, 22460-320, Rio de Janeiro Brazil,
- 3- Department of Production Engineering, Logistics and Applied Computer Science, Faculty of Production and Power Engineering, Agricultural University Kraków, ul. Balicka 116b 30-149 Kraków, Poland
- 4- University of East Anglia, Norwich Research Park, Norwich, NR4 7TJ, United Kingdom
- 5- Federal University of Rio de Janeiro, Department of Ecology – Rio de Janeiro, Brazil
- 6- Department of Conservation Ecology & Entomology, Stellenbosch University, Private Bag x1, Matieland, 7602, South Africa
- 7- Norwegian Geotechnical Institute (NGI), P.O. Box 3930, Ullevål Stadion, N-0806 Oslo, Norway
- 8- Institute for Sustainability Science and Technology, Universitat Politècnica de Catalunya, Jordi Girona 1-3, 08034, Barcelona, Spain
- 9 -School of Natural Sciences, Technology and Environmental Studies, Södertörn University, Stockholm, Sweden
- 10-Lina Suleiman, Department of Urban Planning and Environment, School of Architecture and the Built Environment, KTH, Royal Institute of Technology, Stockholm, Sweden

### Supplementary material 1 (SM 1)

**Supplementary Material Table S1**| Systematic review spreadsheet

-File attached separately.

## Supplementary material 2 (SM 2)

Supplementary Material Table S2| Attributes table

| Attribute id | Attribute                                                       | Attribute type (# categories) | Attribute values                                                        | Description                                                                                                                                                                                                                                                                                                                                                                                                                                                                                                                                                                      |
|--------------|-----------------------------------------------------------------|-------------------------------|-------------------------------------------------------------------------|----------------------------------------------------------------------------------------------------------------------------------------------------------------------------------------------------------------------------------------------------------------------------------------------------------------------------------------------------------------------------------------------------------------------------------------------------------------------------------------------------------------------------------------------------------------------------------|
| 1            | Title                                                           | (text)                        |                                                                         | Title of the article.                                                                                                                                                                                                                                                                                                                                                                                                                                                                                                                                                            |
| 2            | Journal                                                         | (text)                        |                                                                         | Journal where the work was published.                                                                                                                                                                                                                                                                                                                                                                                                                                                                                                                                            |
| 3            | Authors                                                         | (text)                        |                                                                         | Article authors.                                                                                                                                                                                                                                                                                                                                                                                                                                                                                                                                                                 |
| 4            | Year of publication                                             | (text)                        |                                                                         | Year the article was published.                                                                                                                                                                                                                                                                                                                                                                                                                                                                                                                                                  |
| 5            | Key-words                                                       | (text)                        |                                                                         | Article keywords chosen by the authors.                                                                                                                                                                                                                                                                                                                                                                                                                                                                                                                                          |
| 6            | Article objective                                               | (text)                        |                                                                         | Article objective as described in the publication.                                                                                                                                                                                                                                                                                                                                                                                                                                                                                                                               |
| 7            | Spatial context                                                 | Category (5)                  | Urban,<br>Peri-urban,<br>Rural,<br>General<br>Not clear/ Not applicable | Spatial context in which the framework should be applied, mentioned explicitly in the article.                                                                                                                                                                                                                                                                                                                                                                                                                                                                                   |
| 8            | Article approach                                                | Category (3)                  | Conceptual,<br>Practical<br>Both                                        | We consider 'conceptual' articles in which there is no application of the framework in a case study / experience. We consider 'practical' articles that present a case study / experience related to the application of the framework.                                                                                                                                                                                                                                                                                                                                           |
| 9            | Challenge addressed                                             | (text)                        |                                                                         | Challenges that NBS aims to overcome.                                                                                                                                                                                                                                                                                                                                                                                                                                                                                                                                            |
| 10           | Words/concepts related to NBS                                   | (text)                        |                                                                         |                                                                                                                                                                                                                                                                                                                                                                                                                                                                                                                                                                                  |
| 11           | Direct reference to SDG in the framework                        | Category (2)                  | Yes/No                                                                  | Direct mention to SDGs. Include which SDG if cited.                                                                                                                                                                                                                                                                                                                                                                                                                                                                                                                              |
| 12           | Sustainability dimension addressed                              | Category (3)                  | EcologicalSocialEconomic                                                | Whether the framewrok emphasizes NBS ecological, economic or social functions (NATWIP proposal, 2018). We consider it "ecological" when there is an emphasis on natural capital (examples: solar energy, earth materials, biogeochemical cycles, etc.). We consider it "social" when there is an emphasis on social and / or human capital (examples: health, wealth, leisure, mobility, education, gender equality, etc.). We consider it "economic" when there is an emphasis on economic development or avoided costs (examples: income increase and equality, job creation). |
| 13           | Assess approach of the framework (Qualitative or quantitative?) | Category (4)                  | Qualitative,<br>Quantitative,<br>Both<br>Not clear/ Not applicable      | Whether the framework assess / address qualitatively or quantitatively or both the benefits / issues.                                                                                                                                                                                                                                                                                                                                                                                                                                                                            |
| 14           | Framework's purpose in relation to NBS                          | Category (4)                  | Planning,<br>Evaluate,<br>Both<br>Not clear/ Not applicable             | Whether the framework was designed for NBS planning and/or evaluation/assessment.                                                                                                                                                                                                                                                                                                                                                                                                                                                                                                |

### Supplementary material 3 (SM 3)

**Supplementary Material Table S3** | The timeline of the meetings and workshops as well as steps in the framework construction process.

| DATE       | THEME ADDRESSED/AGENDA                                                                                                                                                                         |
|------------|------------------------------------------------------------------------------------------------------------------------------------------------------------------------------------------------|
| 09/01/2020 | International meeting - Discussion about the NBS definition adopted and its' reflections on framework construction .                                                                           |
| 30/01/2020 | International meeting- Discussion about existing frameworks and the gaps that the framework could fill.                                                                                        |
| 07/02/2020 | International meeting- Discussion about the peri-urban concepts and differences according to the local needs and the necessity to construct a flexible scheme adaptable to different contexts. |
| 03/03/2020 | 1°Workshop of framework construction design.                                                                                                                                                   |
| 10/03/2020 | 2°Workshop of framework construction design.                                                                                                                                                   |
| 11/03/2020 | 3°Workshop of framework construction design.                                                                                                                                                   |
| 31/03/2020 | International Meeting- Analysis of the first draft of the framework and organization of the next steps to refine the scheme.                                                                   |
| 09/04/2020 | Internal Meeting- Discussion about the indicators related to the framework.                                                                                                                    |
| 14/04/2020 | Internal Meeting- Discussion about the indicators related to the framework.                                                                                                                    |
| 15/04/2020 | International Meeting- Consultation about indicators classification.                                                                                                                           |
| 23/04/2020 | Meeting with graphic designer to elaborate the framework images.                                                                                                                               |
| 06/05/2020 | Meeting with a Brazilian expert on NBS implementation- Discussion about indicators used on the project “Water and Forest Producer”                                                             |
| 27/05/2020 | Internal Meeting- Adjustments and organization of the indicators table.                                                                                                                        |
| 04/06/2020 | Meeting between Brazilian and Spanish experts- Discussion about the NBS literature review and NBS framework.                                                                                   |
| 08/06/2020 | Meeting between Brazilian and England experts. Discussion about the changes adopted to the framework and indicators table.                                                                     |
| 16/06/2020 | Meeting with graphic designer to discuss adjustments to the framework images                                                                                                                   |
| 17/06/2020 | Meeting with Brazilian experts - Classification of the indicators suggested as process and result indicators.                                                                                  |
| 29/06/2020 | Meeting with Brazilian experts - Final adjustment of the indicators organization according to the categories.                                                                                  |
| 30/06/2020 | Meeting with Brazilian experts - Alignment between the indicators organization and the framework categories and dimensions.                                                                    |
| 02/02/2020 | Meeting between international experts- Final consultation of refined framework and indicators classification/organization.                                                                     |

## Supplementary Material Figures S1–S2 | Workshop of framework construction design.

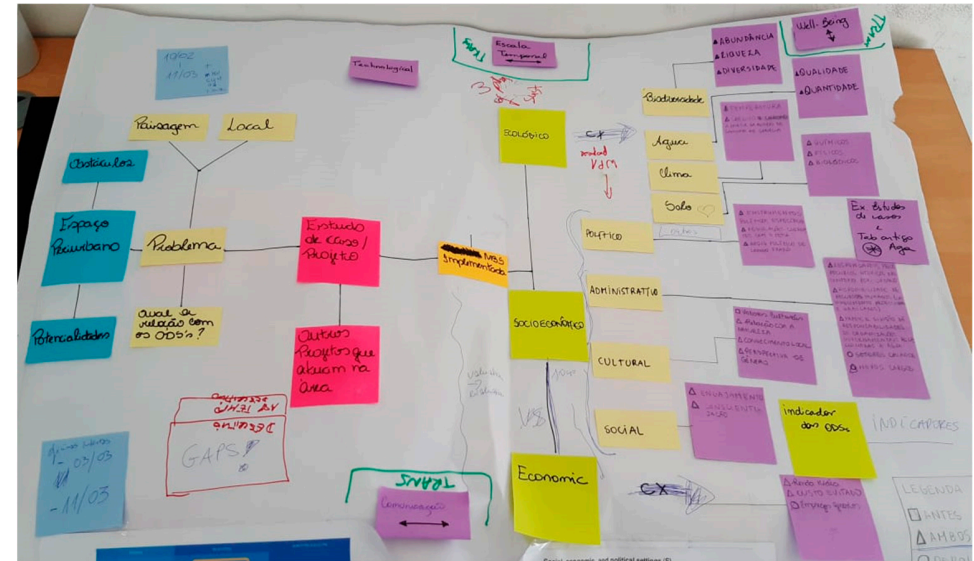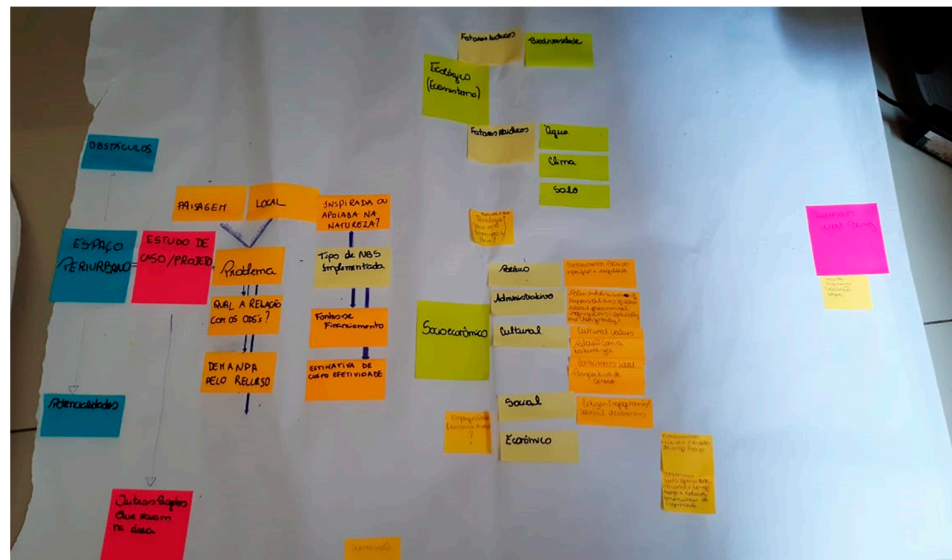

## Supplementary material 5 (SM 5)

### Supplementary Material Description and Figures S3–S5 | Water and Forest Producer Project

The Water and Forest producer project is a payment for environmental services project in a peri-urban area in Rio de Janeiro, Brazil. In this project, rural producers receive money as an incentive to restore and conserve forest areas on their properties. This restoration aims to improve the quality and quantity of water. These actions have been implemented in a basin responsible for providing water to more than 7 million people.

The following links provide more information about the project:

[http://www.itpa.org.br/wp-content/uploads/PSA\\_da\\_Teoria\\_a\\_Pratica\\_MauricioRuiz\\_ITPA-1.pdf](http://www.itpa.org.br/wp-content/uploads/PSA_da_Teoria_a_Pratica_MauricioRuiz_ITPA-1.pdf)

[http://www.itpa.org.br/?page\\_id=497](http://www.itpa.org.br/?page_id=497)

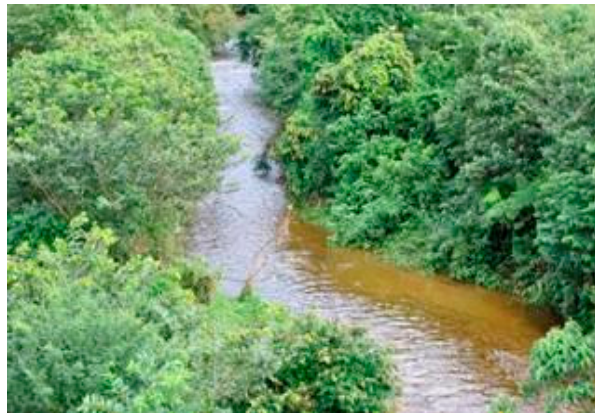

**Riparian Forest Restoration at Papudos River**

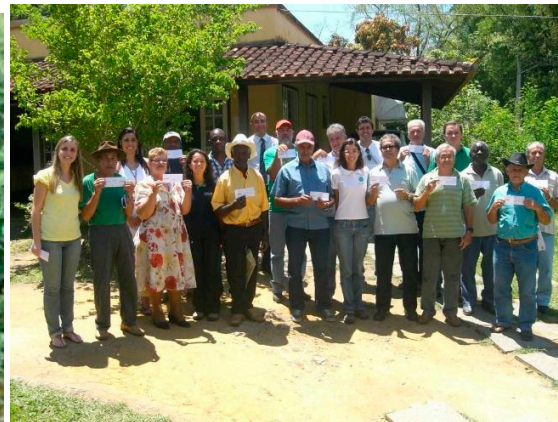

**Producers receiving payment**

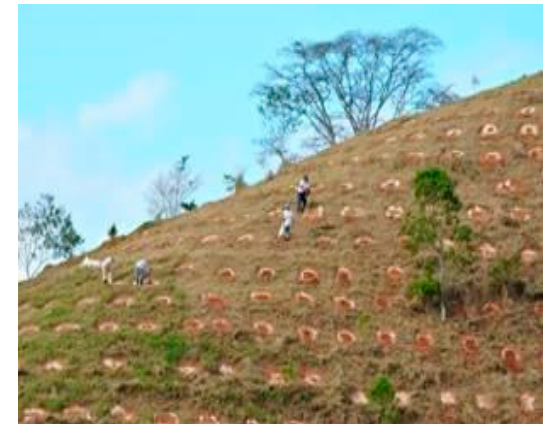

**Preparation for Forest Restoration**

## Supplementary material 6 (SM 6)

**Supplementary Material Table S4-1** | Table of qualitative information (Context assessment).

| INFORMATION REQUIRED   | SPECIFICATION   | EXAMPLES                                                                                                                        |
|------------------------|-----------------|---------------------------------------------------------------------------------------------------------------------------------|
| Location               | Continent       |                                                                                                                                 |
|                        | Country         |                                                                                                                                 |
|                        | City            |                                                                                                                                 |
| Type                   |                 | Urban, peri-urban, rural...                                                                                                     |
| Threats                |                 | Lack of legislation, absence from the state...                                                                                  |
| Opportunities          |                 | Labor, participatory community ...                                                                                              |
| Challenge              |                 | Floods/Drought/Water supply/Climate changes/ Society's                                                                          |
| Pressure               | Local Scale     | Drug trafficking, real estate speculation, water pollution ...                                                                  |
|                        | Landscape Scale |                                                                                                                                 |
| Actors identification  |                 | List of institutions in the area related to the target (local or regional government/ Civil society/ Academia/ Industry/ Other) |
| SDGs association       |                 | Goals number                                                                                                                    |
| OTHER PROJECT IN PLACE |                 |                                                                                                                                 |

**Supplementary Material Table S4-2** | Table of indicators (process)

| Project/Case                                      | Qualitative Information                                                                  | Information Recquired                                |                                                  | Example                                                                                                                                  |
|---------------------------------------------------|------------------------------------------------------------------------------------------|------------------------------------------------------|--------------------------------------------------|------------------------------------------------------------------------------------------------------------------------------------------|
|                                                   |                                                                                          | Actors Involved                                      |                                                  | List of institutions in the area related to the NBS (local or regional government/ Civil society/ Academia/ Industry/ landowners/ Other) |
|                                                   |                                                                                          | NBS Scale                                            |                                                  | Local, regional, national...                                                                                                             |
|                                                   |                                                                                          | NBS Type                                             |                                                  | Restoration, river park, biowasle, green roof...                                                                                         |
|                                                   | Process Indicators                                                                       | Dimension                                            | Category                                         | Input/ Output Indicators                                                                                                                 |
|                                                   |                                                                                          | Environmental                                        | Interventions                                    | Number of trees seedlings planted                                                                                                        |
|                                                   |                                                                                          |                                                      |                                                  | Number of green roofs implemented                                                                                                        |
|                                                   |                                                                                          |                                                      |                                                  | Number of roads recovered                                                                                                                |
|                                                   |                                                                                          |                                                      |                                                  | Area that received the green and blue infrastructure                                                                                     |
|                                                   |                                                                                          |                                                      |                                                  | Rate of trees seedlings planted survival                                                                                                 |
|                                                   |                                                                                          |                                                      |                                                  | Other                                                                                                                                    |
|                                                   |                                                                                          | Social                                               | Project Management                               | Availability of human resources                                                                                                          |
|                                                   |                                                                                          |                                                      | Political Support                                | Number of people participating in the NBS project                                                                                        |
| Number of laws and policies developed or reformed |                                                                                          |                                                      |                                                  |                                                                                                                                          |
| Cultural/ Awerness or Educational                 |                                                                                          |                                                      | Long term political support                      |                                                                                                                                          |
| Commitment                                        |                                                                                          |                                                      | Incorporation of cultural values and perceptions |                                                                                                                                          |
|                                                   | Continuous participation in the NbS Process (level of participation in each cycle phase) |                                                      |                                                  |                                                                                                                                          |
| Other                                             |                                                                                          |                                                      |                                                  |                                                                                                                                          |
| Economic                                          | Income and Jobs                                                                          | Number of jobs created directlty                     |                                                  |                                                                                                                                          |
|                                                   |                                                                                          | Number of income generating activities (IGA) created |                                                  |                                                                                                                                          |
| Household Income                                  |                                                                                          |                                                      |                                                  |                                                                                                                                          |

## Supplementary Material Table

### S4-3 | Table of indicators (results)

| LEVELS/ STAGE                         | DIMENSIONS    | CATEGORY                                  | OUTCOMES/ IMPACTS INDICATORS                                                                          |
|---------------------------------------|---------------|-------------------------------------------|-------------------------------------------------------------------------------------------------------|
| NBS RESULTS<br>(outcomes and impacts) | Social        | Cultural                                  | Valorization of natural resoucers<br>visitation of natural/green spaces                               |
|                                       |               | Politics and governance                   | development of new policies related to NBS<br>Improvements/adjustments to existing policy instruments |
|                                       |               | Water Provisioning services               | Water Depth<br>Water Table Level<br>Number of springs<br>StreamFlow                                   |
|                                       | Environmental | Water Regulation and maintenance services | Turbidity                                                                                             |
|                                       |               |                                           | Dissolved oxygen cocentration                                                                         |
|                                       |               |                                           | Nutrient (N, P) concentration                                                                         |
|                                       |               |                                           | Cyanobacteria bloom events                                                                            |
|                                       |               |                                           | Biochemical Oxygen Demand (BOD)                                                                       |
|                                       |               |                                           | Total coliforms                                                                                       |
|                                       |               |                                           | Total nitrogen                                                                                        |
|                                       |               |                                           | nitrate                                                                                               |
|                                       |               |                                           | Nitrite                                                                                               |
|                                       |               |                                           | Ammoniacal nitrogen                                                                                   |
|                                       |               |                                           | Dissolved inorganic phosphate (PID)                                                                   |
|                                       |               |                                           | Total dissolved phosphates (PTD)                                                                      |
|                                       |               |                                           | Heavy metals                                                                                          |
|                                       |               |                                           | Pesticides                                                                                            |
|                                       |               |                                           | Dissolved organic carbon (DOC)                                                                        |
|                                       |               |                                           | Dissolved inorganic carbon (DIC)                                                                      |
|                                       |               |                                           | pH                                                                                                    |
|                                       |               |                                           | Cations (sodium, calcium, potassium, magnesium)                                                       |
|                                       |               |                                           | Anions (carbonates, bicarbonates, chlorides, sulfates,                                                |
|                                       |               |                                           | Total hardness                                                                                        |
|                                       |               |                                           | Chlorophyll                                                                                           |
|                                       |               |                                           | Oils and greases                                                                                      |
|                                       |               |                                           | Salinity                                                                                              |
|                                       |               |                                           | Alkalinity                                                                                            |
|                                       |               |                                           | Other                                                                                                 |
|                                       |               | Soil Regulation and Maintenance           | Soil Permeability<br>Erosion prevention                                                               |
|                                       |               | Biodiversity Conservation                 | Diversity Index                                                                                       |
|                                       |               |                                           | Composition (aquatic and terrestrial species)                                                         |
|                                       |               |                                           | Presence of bioindicators species (fauna and flora)                                                   |
|                                       |               |                                           | Habitat Conectivity                                                                                   |
|                                       |               |                                           | Aquatic diversity index                                                                               |
|                                       |               |                                           | Aquatic species richness                                                                              |
|                                       |               |                                           | Percentage of cover native vegetation                                                                 |
|                                       |               | Socio-Cultural services                   | Benthic organisms                                                                                     |
|                                       |               |                                           | Percentage of Invasive exotic vegetation                                                              |
|                                       |               |                                           | Recreational uses                                                                                     |
|                                       |               |                                           | Aesthetic improvement                                                                                 |
|                                       |               |                                           | Social/cultural values for ecoystems and biodiversity                                                 |
|                                       |               |                                           | Spiritual, symbolic and other interactions with natural environment                                   |
|                                       |               |                                           | Tourism (aquatic, farm, Forest)                                                                       |
|                                       | Economic      | Income and Jobs                           | Number of income generating activities (IGA) created indirectly                                       |
|                                       |               |                                           | Number of jobs created indirectly                                                                     |
|                                       |               |                                           | Land Price                                                                                            |
|                                       |               |                                           | Property betterment                                                                                   |
|                                       |               | Avoided Costs                             | Water treatment costs<br>Fertilizers costs                                                            |



## Supplementary Material 7 (SM7)

### Supplementary Material SM7 | Planning Cycle phases definitions

| Planning cycle phases    | Definitions                                                                                                                                                                                                                                                                                                                                                                                                                                  |
|--------------------------|----------------------------------------------------------------------------------------------------------------------------------------------------------------------------------------------------------------------------------------------------------------------------------------------------------------------------------------------------------------------------------------------------------------------------------------------|
| Research and development | An activity that depends on a specific question or objective. It could be R&D to test out solutions in the lab/meso or pilot scale or it could be desk work investigating the site to implement a possible NBS.                                                                                                                                                                                                                              |
| Planning                 | This is a more general term and is related to the planning that is needed for the intervention. It encompasses desktop studies, and preliminary investigations to assess a potential intervention(s). It can also include the involvement of stakeholders to check the suggested NBS is viable at the site (feasibility study). It may include a prediction of the expected expenses and the planning of actions for the NBS implementation. |
| Conceptual design        | This is the moment when the urban planners, landscape architects and engineers (among others) with relevant backgrounds make the overarching design of the NBS. This moves the NBS from what is viable to a specific solution (conceptual).                                                                                                                                                                                                  |
| Detailed design          | The actual design of the intervention (engineering calculations, models completed) which is most often communicated as technical drawings that can be directly used for the construction of the intervention.                                                                                                                                                                                                                                |
| Construction             | The physical construction of the NBS by those including construction companies, NGOs and local people at the project site.                                                                                                                                                                                                                                                                                                                   |
| Monitoring               | The process of collecting and analyzing data and information aiming to identify changes in relation to a baseline.                                                                                                                                                                                                                                                                                                                           |
| Evaluation               | The process of examining the monitoring data to identify the influences/impacts of the project activities and summarize lessons learned.                                                                                                                                                                                                                                                                                                     |
| Adjustments              | The process of adjusting project activities to improve results.                                                                                                                                                                                                                                                                                                                                                                              |
